# Supplementary material for: Potassium-modified calcium-ferrate-catalyzed hydrogenation of carbon dioxide to produce light olefins
Source: Royal Society of Chemistry journal article supplement (doi:10.1039/d4nj01579g), 2024-01-01
Supplement: d4nj01579g1.pdf [file d4nj01579g1.pdf]

**Potassium-modified calcium-ferrate-catalyzed hydrogenation of  
carbon dioxide to produce light olefins**

Aixin Cui<sup>a</sup>, Man Wu<sup>a</sup>, Tuo Guo<sup>a,b\*</sup>, Xiunan Sun<sup>c</sup>, Yulong Chen<sup>a</sup>, Qingjie Guo<sup>a,b\*</sup>

*<sup>a</sup> Laboratory of Green & Smart Chemical Engineering in Universities of Shandong,  
College of Chemical Engineering, Qingdao University of Science and Technology,  
Qingdao, Shandong 266042, China*

*<sup>b</sup> Xinyuan Green Carbon Technology (Jiangmen) Co., Ltd, Jiangmen, 529199, China.*

*<sup>c</sup> College of Energy and Chemical Engineering, Ningxia Vocational Technical  
College of Industry and Commerce, Yinchuan 750021, China.*

\*Corresponding author.

Address: 53 Zhengzhou Road, Shibei District, Qingdao, 266042, Shandong, China.

E-mail address: qingjie\_guo@vip.sina.com (Qingjie Guo);

tuo.guo.20@alumni.ucl.ac.uk (Tuo Guo)

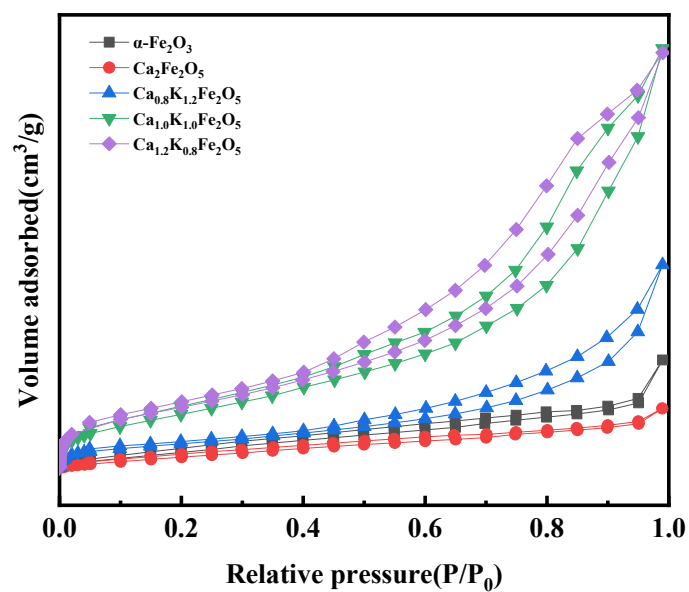

Fig. S1 N<sub>2</sub> adsorption-desorption isotherms of the samples

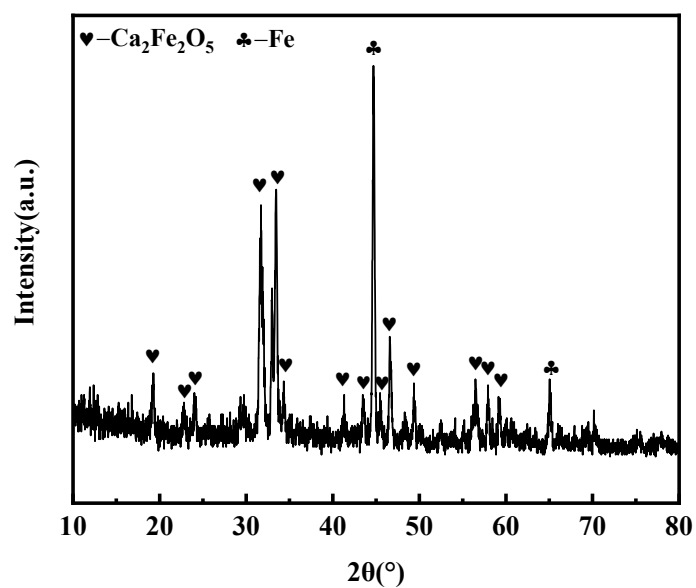

Fig. S2 XRD pattern of Ca<sub>1.0</sub>K<sub>1.0</sub>Fe<sub>2</sub>O<sub>5</sub> catalyst reduction at 520°C

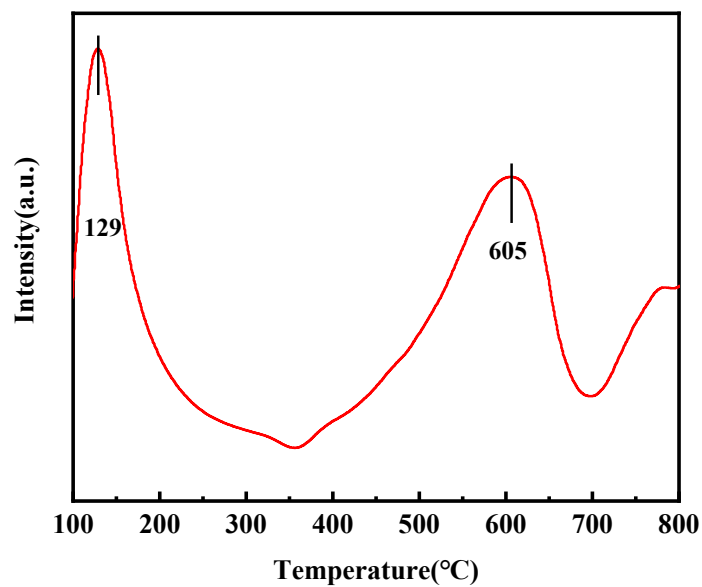

Fig. S3 CO<sub>2</sub>-TPD of the K/α-Fe<sub>2</sub>O<sub>3</sub> catalysts.

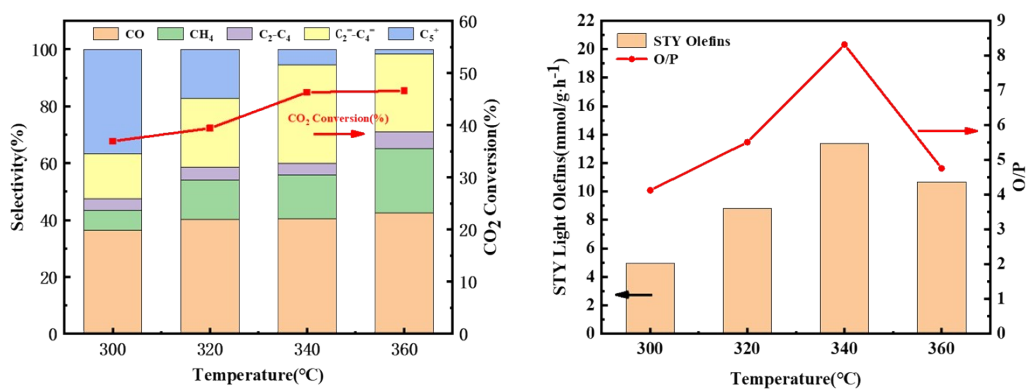

Fig. S4 Effect of temperature on conversion and selectivity over Ca<sub>1.0</sub>K<sub>1.0</sub>Fe<sub>2</sub>O<sub>5</sub>

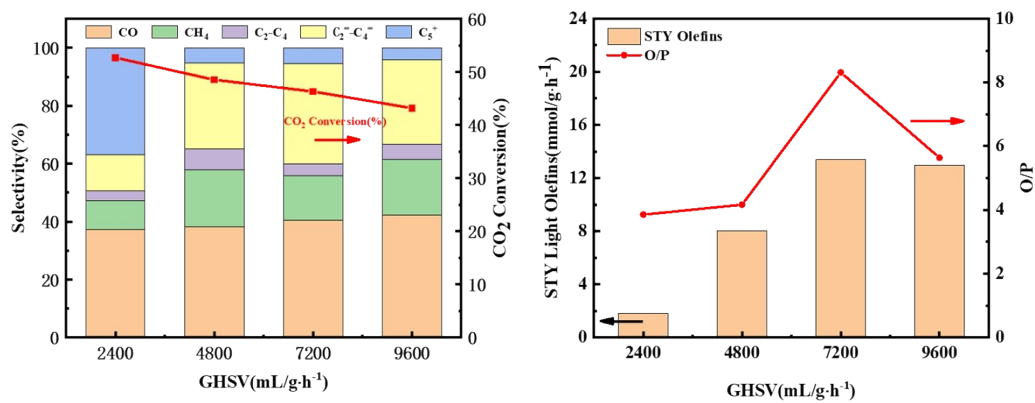

Fig. S5 Effect of GHSV conversion and selectivity over Ca<sub>1.0</sub>K<sub>1.0</sub>Fe<sub>2</sub>O<sub>5</sub>

The effects of temperature and airspeed on catalyst performance are depicted in **Fig S4** and **Fig S5**. The reaction temperature increased from 300°C to 360°C, the CO<sub>2</sub> conversion rate increased from 36.94% to 46.57%, and the CO selectivity increased from 36.34% to 42.56%. Meanwhile, the selectivity of light olefins increased first and then decreased. This is due to the fact that the first step reaction of CO<sub>2</sub> hydrogenation: RWGS is a heat-absorbing reaction, and an increase in temperature favors the RWGS reaction. Elevated temperature leads to more CO and H<sub>2</sub>O being produced in the RWGS reaction, and CO accelerates the FT reaction, resulting in more hydrocarbons being produced. Although the higher temperature is more favorable for the generation of olefins, it also promotes the growth of carbon chains, which makes the proportion of light olefins in the products decrease. By comparing the selectivity of the reaction products at different temperatures, 340°C is more favorable for the generation of light olefins. In addition, the Ca<sub>1.0</sub>K<sub>1.0</sub>Fe<sub>2</sub>O<sub>5</sub> catalyst had the highest STY<sup>=</sup> value (13.40 mmol·g<sup>-1</sup>·h<sup>-1</sup>) at 340°C, which means that 340°C is the optimal temperature for the catalytic preparation of light olefins from CO<sub>2</sub> with this catalyst.

The time of contact between the catalyst surface and the reactants had a significant effect on the conversion and selectivity of the products. Due to the decrease in the contact time between the reactants and the catalyst, the CO<sub>2</sub> conversion slightly decreased from 52.69% to 43.19% and the CO selectivity increased from 37.21% to 42.37% with the increase of GHSV. At the same time, the selectivity of light olefins firstly increased to 34.25% and then decreased to 29.20%, and the O/P value also decreased from 8.31 to 5.64. This was due to the high airspeed, the residence time of CO<sub>2</sub> and H<sub>2</sub> molecules on the catalyst was too short, and the molecules left the surface of the catalyst before completing the catalytic reaction. Moreover, the STY<sup>=</sup> of light olefin is highest at 7200 mL·g<sub>cat</sub><sup>-1</sup>·h<sup>-1</sup>, which is 13.4 mmol·g<sup>-1</sup>·h<sup>-1</sup>. Therefore, the optimum reaction space velocity for Ca<sub>1.0</sub>K<sub>1.0</sub>Fe<sub>2</sub>O<sub>5</sub> catalyst is 7200 mL·g<sub>cat</sub><sup>-1</sup>·h<sup>-1</sup>.

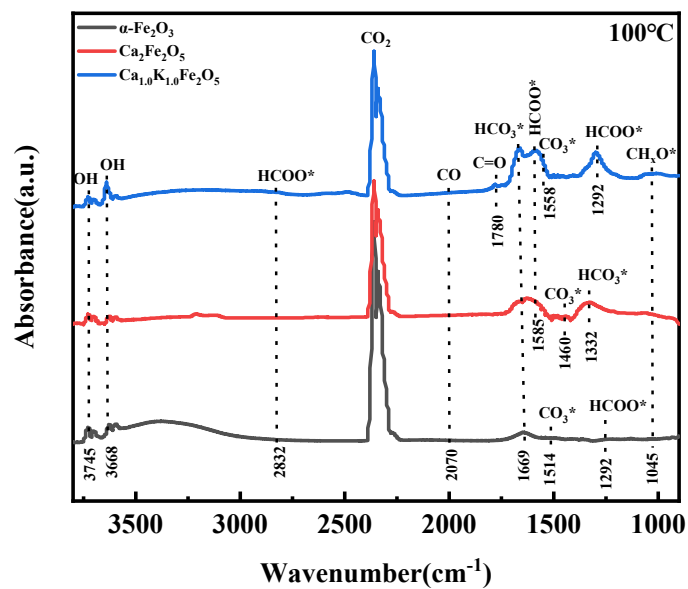

Fig. S6 *In situ* DRIFTS analysis of three reduced samples at 100°C

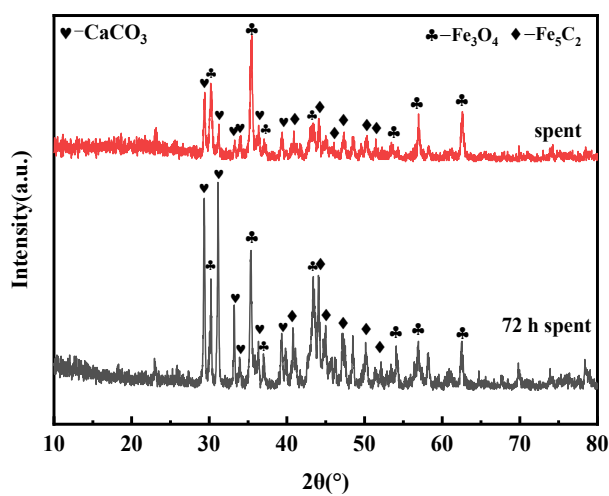

Fig. S7 XRD pattern of  $\text{Ca}_{1.0}\text{K}_{1.0}\text{Fe}_2\text{O}_5$  catalyst after reaction and 72 h cycle

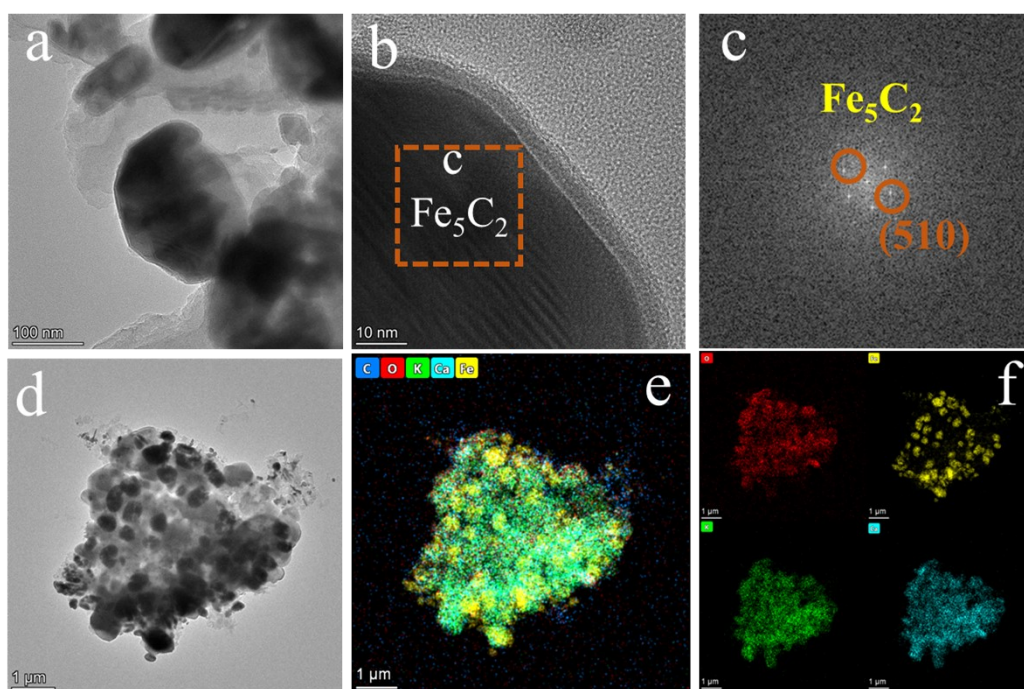

**Fig. S8** HRTEM and EDS images of spent  $\text{Ca}_{1.0}\text{K}_{1.0}\text{Fe}_2\text{O}_5$ : (a-c) HRTEM. (d-f) EDS: (e) All, (f) O, Fe, K, Ca.

**Table S1** Texture properties of catalysts mesoporous materials

| Catalyst                                             | $S_{\text{BET}}^{\text{a}}$<br>( $\text{m}^2 \cdot \text{g}^{-1}$ ) | $\text{PV}^{\text{b}}$<br>( $\text{cm}^3 \cdot \text{g}^{-1}$ ) | $\text{PD}^{\text{b}}$<br>(nm) |
|------------------------------------------------------|---------------------------------------------------------------------|-----------------------------------------------------------------|--------------------------------|
| $\alpha\text{-Fe}_2\text{O}_3$                       | 22.9                                                                | 0.04                                                            | 7.7                            |
| $\text{Ca}_2\text{Fe}_2\text{O}_5$                   | 17.5                                                                | 0.02                                                            | 5.5                            |
| $\text{Ca}_{0.8}\text{K}_{1.2}\text{Fe}_2\text{O}_5$ | 24.1                                                                | 0.08                                                            | 13.8                           |
| $\text{Ca}_{1.0}\text{K}_{1.0}\text{Fe}_2\text{O}_5$ | 56.4                                                                | 0.17                                                            | 12.2                           |
| $\text{Ca}_{1.2}\text{K}_{0.8}\text{Fe}_2\text{O}_5$ | 59.6                                                                | 0.17                                                            | 11.0                           |

a: BET specific surface area;

b: total pore volume and average pore diameter calculated from the desorption branch of the isotherm using the BJH method;

**Table S2** Percentage of  $\text{Fe}_{2\text{p}3/2}$  of spent catalyst

| Samples                                              | $\text{Fe}_{2\text{p}3/2}$ (%) |                  |                |
|------------------------------------------------------|--------------------------------|------------------|----------------|
|                                                      | $\text{Fe}^{2+}$               | $\text{Fe}^{3+}$ | $\text{FeC}_x$ |
| $\alpha\text{-Fe}_2\text{O}_3$                       | 79.16                          | 15.09            | 5.75           |
| $\text{Ca}_2\text{Fe}_2\text{O}_5$                   | 55.33                          | 34.60            | 10.08          |
| $\text{Ca}_{1.2}\text{K}_{0.8}\text{Fe}_2\text{O}_5$ | 52.54                          | 33.32            | 14.14          |
| $\text{Ca}_{1.0}\text{K}_{1.0}\text{Fe}_2\text{O}_5$ | 67.49                          | 17.67            | 14.84          |
| $\text{Ca}_{0.8}\text{K}_{1.2}\text{Fe}_2\text{O}_5$ | 52.58                          | 37.19            | 10.23          |

**Table S3** Percentage of O1s of reduced catalyst

| Samples                                                           | O1s(%)          |                  |                   |
|-------------------------------------------------------------------|-----------------|------------------|-------------------|
|                                                                   | O <sub>OH</sub> | O <sub>ads</sub> | O <sub>latt</sub> |
| $\alpha$ -Fe <sub>2</sub> O <sub>3</sub>                          | 16.23           | 29.05            | 54.72             |
| Ca <sub>2</sub> Fe <sub>2</sub> O <sub>5</sub>                    | 12.54           | 51.01            | 36.45             |
| Ca <sub>1.2</sub> K <sub>0.8</sub> Fe <sub>2</sub> O <sub>5</sub> | 4.94            | 58.66            | 36.40             |
| Ca <sub>1.0</sub> K <sub>1.0</sub> Fe <sub>2</sub> O <sub>5</sub> | 8.48            | 61.66            | 16.87             |
| Ca <sub>0.8</sub> K <sub>1.2</sub> Fe <sub>2</sub> O <sub>5</sub> | 11.53           | 59.66            | 28.81             |

**Table S4** Catalytic activity of the Fe-based catalysts.

| Sample                                                            | CO <sub>2</sub><br>Conv.<br>(%) | Selectivity (%) |                 |                                                           |                                                           |                             | STY=<br>(mmol·g <sup>-1</sup> ·h <sup>-1</sup> ) | O/P  |
|-------------------------------------------------------------------|---------------------------------|-----------------|-----------------|-----------------------------------------------------------|-----------------------------------------------------------|-----------------------------|--------------------------------------------------|------|
|                                                                   |                                 | CO              | CH <sub>4</sub> | C <sub>2</sub> <sup>0</sup> - C <sub>4</sub> <sup>0</sup> | C <sub>2</sub> <sup>-</sup> - C <sub>4</sub> <sup>-</sup> | C <sub>5</sub> <sup>+</sup> |                                                  |      |
| $\alpha$ -Fe <sub>2</sub> O <sub>3</sub>                          | 34.55                           | 27.92           | 36.85           | 31.49                                                     | 3.33                                                      | 0.41                        | 0.96                                             | 0.11 |
| K/Fe <sub>2</sub> O <sub>3</sub>                                  | 38.00                           | 50.28           | 12.67           | 6.33                                                      | 24.43                                                     | 5.39                        | 7.46                                             | 3.86 |
| Ca <sub>2</sub> Fe <sub>2</sub> O <sub>5</sub>                    | 37.38                           | 56.32           | 23.46           | 13.84                                                     | 5.94                                                      | 0.44                        | 1.86                                             | 0.43 |
| Ca <sub>0.8</sub> K <sub>1.2</sub> Fe <sub>2</sub> O <sub>5</sub> | 40.48                           | 43.67           | 22.96           | 4.91                                                      | 25.35                                                     | 3.12                        | 8.58                                             | 5.16 |
| Ca <sub>1.0</sub> K <sub>1.0</sub> Fe <sub>2</sub> O <sub>5</sub> | 46.33                           | 40.43           | 15.35           | 4.16                                                      | 34.59                                                     | 5.47                        | 13.4                                             | 8.31 |
| Ca <sub>1.2</sub> K <sub>0.8</sub> Fe <sub>2</sub> O <sub>5</sub> | 43.30                           | 42.67           | 18.18           | 5.39                                                      | 26.49                                                     | 7.27                        | 9.59                                             | 4.91 |

Reaction parameters: H<sub>2</sub>/CO<sub>2</sub> = 3; T = 340°C; P = 1.5 MPa; GHSV= 7200 mL·g<sub>cat</sub><sup>-1</sup>·h<sup>-1</sup>

**Table S5** Comparison of catalytic performance of different catalysts

| Catalysts                                                              | T    | P     | CO <sub>2</sub> | C <sub>2</sub> <sup>-</sup> - C <sub>4</sub> <sup>-</sup> | O/P  | Ref.      |
|------------------------------------------------------------------------|------|-------|-----------------|-----------------------------------------------------------|------|-----------|
|                                                                        | (°C) | (MPa) | Con.(%)         | Sel.(%)                                                   |      |           |
| K/La <sub>0.4</sub> Co <sub>0.4</sub> Fe <sub>0.6</sub> O <sub>3</sub> | 320  | 2.0   | 36.00           | 29.31                                                     | 1.95 | 1         |
| Na-Mn-CuFeO <sub>2</sub>                                               | 320  | 2.0   | 36.60           | 35.70                                                     | 3.90 | 2         |
| K-CoFe <sub>2</sub> O <sub>4</sub>                                     | 320  | 3.0   | 46.80           | 27.50                                                     | 1.23 | 3         |
| Na-CoFe <sub>2</sub> O <sub>4</sub>                                    | 320  | 3.0   | 41.80           | 37.20                                                     | 5.39 | 4         |
| K-ZnCo <sub>0.5</sub> Fe <sub>1.5</sub> O <sub>4</sub>                 | 320  | 2.5   | 49.60           | 36.1                                                      | 5.82 | 5         |
| Sr <sub>0.6</sub> K <sub>0.4</sub> FeO <sub>3</sub>                    | 350  | 1.0   | 30.82           | 29.61                                                     | 5.48 | 6         |
| Ca <sub>1.0</sub> K <sub>1.0</sub> Fe <sub>2</sub> O <sub>5</sub>      | 340  | 1.5   | 46.33           | 34.59                                                     | 8.31 | This work |

**Reference:**

1. X. Sun, T. Guo, M. An, X. Guo, Z. Han, D. Zhai, J. Ma, X. Hu, J. Zhang, Y. He and Q. Guo, *Int. J. Hydrog. Energy*, 2024, **51**, 368-381.
2. G. Singh, D. Khurana, T. S. Khan, I. K. Ghosh, B. Chowdhury, A. Y. Khodakov and A. Bordoloi, *Applied Surface Science*, 2023, **616**.
3. M. Z. M. Wang, F. Ding, F. Yuan, G. Zhang, X. Nie, X. Guo., *Low-Carbon*

*Chemistry and Chemical Engineering*, 2023, **48**, 41-49.

4. F. Yuan, G. Zhang, J. Zhu, F. Ding, A. Zhang, C. Song and X. Guo, *Catalysis Today*, 2021, **371**, 142-149.

5. Q. Q. Xu, X. Q. Xu, G. L. Fan, L. Yang and F. Li, *J. Catal.*, 2021, **400**, 355-366.

6. X. W. Y. Hou, M. Chen, X. Gao, Y. Liu, Q. Guo,, *Atmosphere*, 2022, **13**, 760.
